# Supplementary material
Source: PubMed Central journal article supplement (PMC7482260)
Supplement: rspb20200948supp1.pdf [file rspb20200948supp1.pdf]

## Supplementary Materials for

Polygenic basis for adaptive morphological variation in a threatened  
Aotearoa | New Zealand bird, the hihi (*Notiomystis cincta*)

Laura Duntsch, Barbara M. Tomotani, Pierre de Villemereuil, Patricia Brekke, Kate D.  
Lee, John G. Ewen and Anna W. Santure

Correspondence to: [ldun612@aucklanduni.ac.nz](mailto:ldun612@aucklanduni.ac.nz)

Journal: *Proceedings of the Royal Society B: Biological Sciences*

DOI: 10.1098/RSPB-2020-0948

This PDF file includes:

Tables S1 to S6

Figures S1 to S7

**Table S1:** Overview of the SNP markers genotyped per chromosome in the hihi, the chromosome size based on the zebra finch reference genome and the original and adjusted/composite chromosome names for each analysis. Chromosome 77 represents SNPs that mapped to random or the 'Unknown' zebra finch chromosomes or were not mapped to a zebra finch chromosome.

| Zebra finch chromosome number | Zebra finch chromosome length | Inferred hihi chromosome number | Hihi markers genotyped | <i>MCMCglmm</i> merge code |
|-------------------------------|-------------------------------|---------------------------------|------------------------|----------------------------|
| 1                             | 118,548,696                   | 1                               | 4,189                  | 1                          |
| 2                             | 156,412,533                   | 2                               | 5,569                  | 2                          |
| 3                             | 112,617,285                   | 3                               | 3,962                  | 3                          |
| 4                             | 69,780,378                    | 4                               | 2,580                  | 4                          |
| 5                             | 62,374,962                    | 5                               | 2,209                  | 5                          |
| 6                             | 36,305,782                    | 6                               | 1,323                  | 6                          |
| 7                             | 39,844,632                    | 7                               | 1,478                  | 7                          |
| 8                             | 27,993,427                    | 8                               | 1,010                  | 8                          |
| 9                             | 27,241,186                    | 9                               | 975                    | 9                          |
| 10                            | 20,806,668                    | 10                              | 1,183                  | 10                         |
| 11                            | 21,403,021                    | 11                              | 1,254                  | 11                         |
| 12                            | 21,576,510                    | 12                              | 1,216                  | 12                         |
| 13                            | 16,962,381                    | 13                              | 915                    | 13                         |
| 14                            | 16,419,078                    | 14                              | 919                    | 14                         |
| 15                            | 14,428,146                    | 15                              | 806                    | a                          |
| 17                            | 11,648,728                    | 17                              | 622                    | b                          |
| 18                            | 11,201,131                    | 18                              | 603                    | b                          |
| 19                            | 11,587,733                    | 19                              | 574                    | b                          |
| 20                            | 15,652,063                    | 20                              | 850                    | 20                         |
| 21                            | 5,979,137                     | 21                              | 326                    | c                          |
| 22                            | 3,370,227                     | 22                              | 180                    | c                          |
| 23                            | 6,196,912                     | 23                              | 327                    | c                          |
| 24                            | 8,021,379                     | 24                              | 431                    | c                          |
| 25                            | 1,275,379                     | 25                              | 57                     | c                          |
| 26                            | 4,907,541                     | 26                              | 277                    | c                          |
| 27                            | 4,618,897                     | 27                              | 209                    | c                          |
| 28                            | 4,963,201                     | 28                              | 258                    | c                          |
| 1A                            | 7,3657,157                    | 1A                              | 2,683                  | 1A                         |
| 1B                            | 1,083,483                     | 1B                              | 38                     | c                          |
| 4A                            | 20,704,505                    | 4A                              | 734                    | a                          |
| LGE422                        | 883,365                       | LGE422                          | 62                     | c                          |
| -                             | -                             | 77                              | 1,880                  | 77                         |

**Table S2:** Output from the pedigree-based *MCMCglimm* run of generalized mixed models for tarsus length (mm), body mass (g) and head-bill length (mm) including 523 hihi. f.effect = fixed effects fitted in the model, mean = trait means, vp = total phenotypic variance, cvp = total coefficient of variation, va = additive genetic variance, cva = additive genetic coefficient of variation, h2 = heritability,  $va / (mean^2)$  = evolvability.

| Trait         | f.effect         | mean     | mean.mode | mean.low | mean.up  | vp       | vp.mode  |
|---------------|------------------|----------|-----------|----------|----------|----------|----------|
| <b>Tarsus</b> | Sex + ClutchSize | 27.57486 | 27.57593  | 27.23846 | 27.9039  | 1.440098 | 1.398983 |
| <b>Mass</b>   | Sex + ClutchSize | 37.01056 | 37.02464  | 35.47931 | 38.49293 | 43.66249 | 43.02144 |
| <b>Head</b>   | Sex + ClutchSize | 38.79296 | 38.74639  | 38.37928 | 39.20361 | 2.845592 | 2.728489 |

  

|               | vp.low   | vp.up    | cvp      | cvp.mode | cvp.low  | cvp.up   | va       |
|---------------|----------|----------|----------|----------|----------|----------|----------|
| <b>Tarsus</b> | 1.149875 | 1.778238 | 4.344749 | 4.283339 | 3.89775  | 4.847318 | 0.190174 |
| <b>Mass</b>   | 36.38902 | 51.66775 | 17.84305 | 17.59028 | 16.23056 | 19.68247 | 2.880239 |
| <b>Head</b>   | 2.359098 | 3.385684 | 4.343733 | 4.300857 | 3.968953 | 4.751838 | 0.343071 |

  

|               | va.mode  | va.se    | va.low   | va.up    | cva      | cva.mode | cva.low  |
|---------------|----------|----------|----------|----------|----------|----------|----------|
| <b>Tarsus</b> | 0.151665 | 0.084186 | 0.04011  | 0.362312 | 1.538985 | 1.67087  | 0.821993 |
| <b>Mass</b>   | 0.035848 | 2.035138 | 4.18E-09 | 6.645591 | 4.237356 | 4.672282 | 0.418941 |
| <b>Head</b>   | 0.303741 | 0.21171  | 1.45E-07 | 0.727702 | 1.423394 | 1.475582 | 0.359751 |

  

|               | cva.up   | h2.mean  | h2.mode  | h2.median | h2.se    | h2.low   | h2.up    |
|---------------|----------|----------|----------|-----------|----------|----------|----------|
| <b>Tarsus</b> | 2.245018 | 0.133024 | 0.112997 | 0.127697  | 0.058695 | 0.028387 | 0.253071 |
| <b>Mass</b>   | 7.286765 | 0.065941 | 0.000651 | 0.059346  | 0.045915 | 1.02E-10 | 0.151345 |
| <b>Head</b>   | 2.386515 | 0.120303 | 0.099629 | 0.112592  | 0.072297 | 5.89E-08 | 0.251649 |

  

|               | $va / (mean^2)$ |
|---------------|-----------------|
| <b>Tarsus</b> | 0.00025010622   |
| <b>Mass</b>   | 0.00210269951   |
| <b>Head</b>   | 0.00022797024   |

**Table S3:** Output from the GRM-based *MCMCglmm* run of generalized mixed models for tarsus length (mm), body mass (g) and head-bill length (mm) including 523 hihi. f.effect = fixed effects fitted in the model, mean = trait means, vp = total phenotypic variance, cvp = total coefficient of variation, va = additive genetic variance, cva = additive genetic coefficient of variation, h2 = heritability,  $va / (\text{mean}^2)$  = evolvability.

| Trait         | f.effect         | mean     | mean.mode | mean.low | mean.up  | vp       | vp.mode  |
|---------------|------------------|----------|-----------|----------|----------|----------|----------|
| <b>Tarsus</b> | Sex + ClutchSize | 27.53591 | 27.53206  | 27.26254 | 27.81346 | 1.453254 | 1.408385 |
| <b>Mass</b>   | Sex + ClutchSize | 36.87699 | 36.88974  | 35.59676 | 38.12623 | 43.46233 | 42.25234 |
| <b>Head</b>   | Sex + ClutchSize | 38.72925 | 38.6998   | 38.40582 | 39.05599 | 2.850764 | 2.797517 |

  

|               | vp.low   | vp.up    | cvp      | cvp.mode | cvp.low  | cvp.up   | va       |
|---------------|----------|----------|----------|----------|----------|----------|----------|
| <b>Tarsus</b> | 1.143742 | 1.810275 | 4.369806 | 4.292538 | 3.901697 | 4.899467 | 0.111009 |
| <b>Mass</b>   | 36.37417 | 51.64145 | 17.86391 | 17.84542 | 16.25706 | 19.62097 | 1.811847 |
| <b>Head</b>   | 2.346352 | 3.410876 | 4.354397 | 4.32261  | 3.973366 | 4.78087  | 0.090762 |

  

|               | va.mode  | va.se    | va.low   | va.up    | cva      | cva.mode | cva.low  |
|---------------|----------|----------|----------|----------|----------|----------|----------|
| <b>Tarsus</b> | 0.097637 | 0.060452 | 1.39E-09 | 0.218855 | 1.156055 | 1.252824 | 0.429957 |
| <b>Mass</b>   | 0.021285 | 1.450521 | 1.14E-08 | 4.548253 | 3.298343 | 3.726922 | 0.009635 |
| <b>Head</b>   | 0.000628 | 0.090347 | 1.42E-15 | 0.270281 | 0.672703 | 0.710392 | 9.74E-08 |

  

|               | cva.up   | h2.mean  | h2.mode  | h2.median | h2.se    | h2.low   | h2.up    |
|---------------|----------|----------|----------|-----------|----------|----------|----------|
| <b>Tarsus</b> | 1.862343 | 0.077121 | 0.061612 | 0.073066  | 0.042292 | 1.02E-09 | 0.153476 |
| <b>Mass</b>   | 5.794001 | 0.041772 | 0.000449 | 0.035736  | 0.033189 | 2.44E-10 | 0.104785 |
| <b>Head</b>   | 1.34189  | 0.031791 | 0.000512 | 0.022964  | 0.031232 | 5.15E-16 | 0.094075 |

  

|               | $va / (\text{mean}^2)$ |
|---------------|------------------------|
| <b>Tarsus</b> | 0.00014640615          |
| <b>Mass</b>   | 0.00133232626          |
| <b>Head</b>   | 0.00006050982          |

**Table S4a:** The ten most significant SNPs associated with tarsus length after *RepeatABEL* GWAS, their MAF, counts of individuals with each genotype and their SNP effect plus the PIP4 (posterior inclusion probability to be in mixture class 4) value from *BayesR* output.

| SNP          | Chromosome | Position | A1 | A2 | MAF        | A1A1 | A1A2 | A2A2 | effB       | se_effB    | P1df         |
|--------------|------------|----------|----|----|------------|------|------|------|------------|------------|--------------|
| AX-172486735 | 3          | 52404441 | G  | T  | 0.14053537 | 389  | 121  | 13   | 0.3672732  | 0.08399748 | 1.228707e-05 |
| AX-171754927 | 1A         | 53396960 | A  | G  | 0.12523901 | 404  | 107  | 12   | 0.3688445  | 0.09187671 | 5.955715e-05 |
| AX-171714808 | 1A         | 56256927 | A  | G  | 0.07101727 | 450  | 68   | 3    | 0.4549406  | 0.11634956 | 9.225069e-05 |
| AX-171722226 | 26         | 378196   | G  | A  | 0.28202677 | 265  | 221  | 37   | -0.2514108 | 0.06598627 | 1.389407e-04 |
| AX-171712697 | 1A         | 56205950 | T  | C  | 0.06692161 | 454  | 68   | 1    | 0.4576042  | 0.12020177 | 1.406814e-04 |
| AX-171764222 | 1A         | 56186866 | C  | T  | 0.06692161 | 454  | 68   | 1    | 0.4576042  | 0.12020177 | 1.406814e-04 |
| AX-171757070 | 4          | 1553827  | G  | A  | 0.32088123 | 252  | 205  | 65   | -0.2226038 | 0.06163531 | 3.042813e-04 |
| AX-171730907 | 1A         | 52785060 | G  | T  | 0.32409178 | 236  | 235  | 52   | 0.2333929  | 0.06473413 | 3.116631e-04 |
| AX-171755458 | 1          | 94512507 | T  | C  | 0.37284895 | 201  | 254  | 68   | 0.2253723  | 0.06346394 | 3.834990e-04 |
| AX-171736922 | 26         | 94531    | A  | G  | 0.13601533 | 386  | 130  | 6    | 0.3088710  | 0.08778972 | 4.343135e-04 |

**Table S4b:** The ten most significant SNPs associated with body mass after *RepeatABEL* GWAS, their MAF, counts of individuals with each genotype and their SNP effect plus the PIP4 (posterior inclusion probability to be in mixture class 4) value from *BayesR* output.

| SNP          | Chromosome | Position  | A1 | A2 | MAF        | A1A1 | A1A2 | A2A2 | effB      | se_effB   | P1df         |
|--------------|------------|-----------|----|----|------------|------|------|------|-----------|-----------|--------------|
| AX-171747347 | 9          | 2151684   | T  | C  | 0.23900574 | 303  | 190  | 30   | 1.500777  | 0.3979115 | 0.0001621817 |
| AX-171750282 | 15         | 5233802   | G  | A  | 0.18007663 | 354  | 148  | 20   | 1.671526  | 0.4477722 | 0.0001892249 |
| AX-171734448 | 9          | 2151452   | C  | T  | 0.23800384 | 302  | 190  | 29   | 1.492961  | 0.4000869 | 0.0001902735 |
| AX-171750191 | 10         | 9200724   | C  | T  | 0.24031008 | 291  | 202  | 23   | 1.462740  | 0.4122596 | 0.0003880159 |
| AX-172485276 | 14         | 13725430  | A  | C  | 0.21839080 | 312  | 192  | 18   | -1.468594 | 0.4156804 | 0.0004108891 |
| AX-171716117 | 14         | 13678108  | T  | C  | 0.21743295 | 312  | 193  | 17   | -1.467433 | 0.4173279 | 0.0004376733 |
| AX-171728749 | 2          | 119853640 | C  | T  | 0.04022989 | 480  | 42   | 0    | 2.950912  | 0.8418522 | 0.0004561593 |
| AX-171722003 | 14         | 13726090  | A  | G  | 0.21892925 | 312  | 193  | 18   | -1.442127 | 0.4151397 | 0.0005130767 |
| AX-171727176 | 14         | 13733955  | A  | G  | 0.21892925 | 312  | 193  | 18   | -1.442127 | 0.4151397 | 0.0005130767 |
| AX-171736867 | 14         | 13667736  | G  | A  | 0.21892925 | 312  | 193  | 18   | -1.442127 | 0.4151397 | 0.0005130767 |

**Table S4c:** The ten most significant SNPs associated with head-bill length after *RepeatABEL* GWAS, their MAF, counts of individuals with each genotype and their SNP effect plus the PIP4 (posterior inclusion probability to be in mixture class 4) value from *BayesR* output.

| SNP          | Chromosome | Position  | A1 | A2 | MAF        | A1A1 | A1A2 | A2A2 | effB       | se_effB   | P1df         |
|--------------|------------|-----------|----|----|------------|------|------|------|------------|-----------|--------------|
| AX-171740203 | 1          | 8013170   | G  | A  | 0.21032505 | 324  | 178  | 21   | -0.4716194 | 0.1126187 | 2.817302e-05 |
| AX-171759269 | 1A         | 70506060  | G  | A  | 0.18103448 | 345  | 165  | 12   | 0.5078508  | 0.1223601 | 3.318053e-05 |
| AX-171742068 | 20         | 269524    | G  | A  | 0.27063340 | 277  | 206  | 38   | -0.4113054 | 0.1054804 | 9.644949e-05 |
| AX-171714808 | 1A         | 56256927  | A  | G  | 0.07101727 | 450  | 68   | 3    | 0.6633574  | 0.1826216 | 2.807810e-04 |
| AX-171714154 | 2          | 117460692 | T  | C  | 0.09464627 | 429  | 89   | 5    | 0.5433429  | 0.1538614 | 4.133998e-04 |
| AX-171730915 | 2          | 117426607 | G  | A  | 0.09464627 | 429  | 89   | 5    | 0.5433429  | 0.1538614 | 4.133998e-04 |
| AX-171746228 | 77         | 46        | A  | G  | 0.09464627 | 429  | 89   | 5    | 0.5433429  | 0.1538614 | 4.133998e-04 |
| AX-172485349 | 2          | 117409659 | A  | G  | 0.09464627 | 429  | 89   | 5    | 0.5433429  | 0.1538614 | 4.133998e-04 |
| AX-171733157 | 1          | 26777224  | C  | A  | 0.13557692 | 386  | 127  | 7    | 0.4859009  | 0.1394753 | 4.943908e-04 |
| AX-171721340 | 2          | 138161355 | A  | G  | 0.25239006 | 284  | 214  | 25   | 0.3844585  | 0.1107671 | 5.187710e-04 |

**Table S5** Summary of the output from the *BayesR* analysis (50,000 iterations and burn-in of 20,000) on the corrected phenotypes of 523 hihi (*top half of the table*). In addition, we report the estimates for the SNP-based heritability ( $h^2_{\text{BayesR}}$ ) for tarsus length, body mass and head-bill length, the total proportion of SNPs contributing to trait variation and the proportion of the number of SNPs assigned to the different effect size distributions of 0.0001, 0.001 and 0.01 (*bottom half of the table*).

|                         | <b>Number of SNPs in model</b> | <b>Sum of squares of SNP effects in mixture component 2<br/>(0.0001)</b> | <b>Sum of squares of SNP effects in mixture component 3<br/>(0.001)</b> | <b>Sum of squares of SNP effects in mixture component 4<br/>(0.01)</b> | <b>Genetic variance explained by SNPs<br/>(Va)</b> | <b>Residual variance<br/>(Ve)</b> |
|-------------------------|--------------------------------|--------------------------------------------------------------------------|-------------------------------------------------------------------------|------------------------------------------------------------------------|----------------------------------------------------|-----------------------------------|
| <b>Tarsus length</b>    | 3,431                          | 0.0236                                                                   | 0.0237                                                                  | 0.0119                                                                 | 0.059                                              | 0.4460                            |
| <b>Body mass</b>        | 3,393                          | 0.4121                                                                   | 0.4244                                                                  | 0.2729                                                                 | 1.110                                              | 12.960                            |
| <b>Head-bill length</b> | 3,598                          | 0.0405                                                                   | 0.03806                                                                 | 0.0279                                                                 | 0.100                                              | 1.2189                            |

  

|                         | $h^2_{\text{BayesR}}$ | <b>Effect size distribution</b> |              |             |              |
|-------------------------|-----------------------|---------------------------------|--------------|-------------|--------------|
|                         |                       | <b>0.0001</b>                   | <b>0.001</b> | <b>0.01</b> | <b>Total</b> |
| <b>Tarsus length</b>    | 0.117                 | 0.077                           | 0.009        | 0.001       | 0.086        |
| <b>Body mass</b>        | 0.079                 | 0.076                           | 0.008        | 0.001       | 0.085        |
| <b>Head-bill length</b> | 0.076                 | 0.082                           | 0.007        | 0.001       | 0.091        |

**Table S6** Power for association analyses with (\*) as calculated from *RepeatABEL*. Following code provided by Wang and Xu (2019), we calculate the power for association from a mixed model analysis as a function of sample size ( $n = 523$ ), the heritability of the locus ( $h^2_{\text{locus}}$ ), the ratio of the additive genetic variance to the residual variance ( $\lambda$ ), the correlation between any pair of individuals in the kinship matrix ( $\rho$ ), the number of markers ( $m = 39,699$ ) and the significance threshold ( $\alpha = 0.05$ ). This calculation gives the power to detect association when the causal variant is typed. Therefore, following Delongchamp et al. (2018), we adjust the sample size to the effective sample size ( $n'$ ) accounting for the average linkage disequilibrium between neighbouring markers ( $r^2 = 0.541$ ) as  $n' = n * r^2 = 523 * 0.541 = 270.914$ . The average  $r^2$  was calculated in plink as described in the main text while  $\rho$  was calculated as the mean of relatedness values in the *RepeatABEL* GRM ( $\rho = -3.090533e-06$ ). To calculate the maximal power for association, for each trait we assume that the trait heritability is fully explained by one causal locus (i.e.  $h^2_{\text{locus}} = \text{total heritability}$ ).

| Trait                   | $h^2_{\text{locus}}$ * | Lambda * | Power |
|-------------------------|------------------------|----------|-------|
| <b>Tarsus length</b>    | 0.081                  | 0.152    | 0.516 |
| <b>Body mass</b>        | 0.065                  | 0.126    | 0.306 |
| <b>Head-bill length</b> | 0.071                  | 0.113    | 0.371 |

<sup>1</sup>Wang M, Xu S. Statistical power in genome-wide association studies and quantitative trait locus mapping. *Heredity*. 2019;123(3):287-306

<sup>2</sup>Delongchamp R, Faramawi MF, Feingold E, Chung D, Abouelenein S. The Association between SNPs and a Quantitative Trait: Power Calculation. *Eur J Environ Public Health*. 2018;2(2):10.

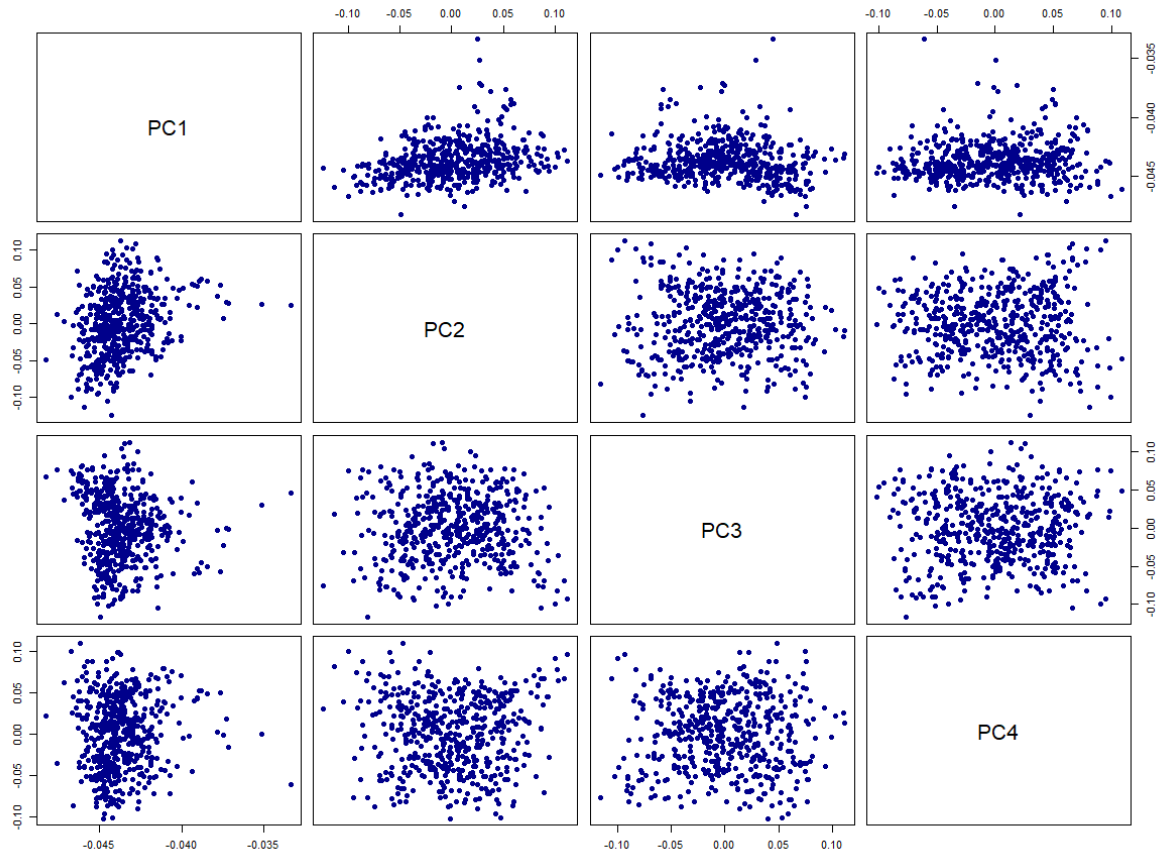

**Figure S1:** Plotted output from a principal component analysis using the 523 hihi genotypes from Tiritiri Matangi island (eigenvalues generated in *PLINK* using the `--pca` function). Shown are the first four principle components, explaining 67.7% (PC1), 3.87% (PC2), 2.59% (PC3) and 2.26% (PC4) of the variance, respectively, revealing no with-population structure.



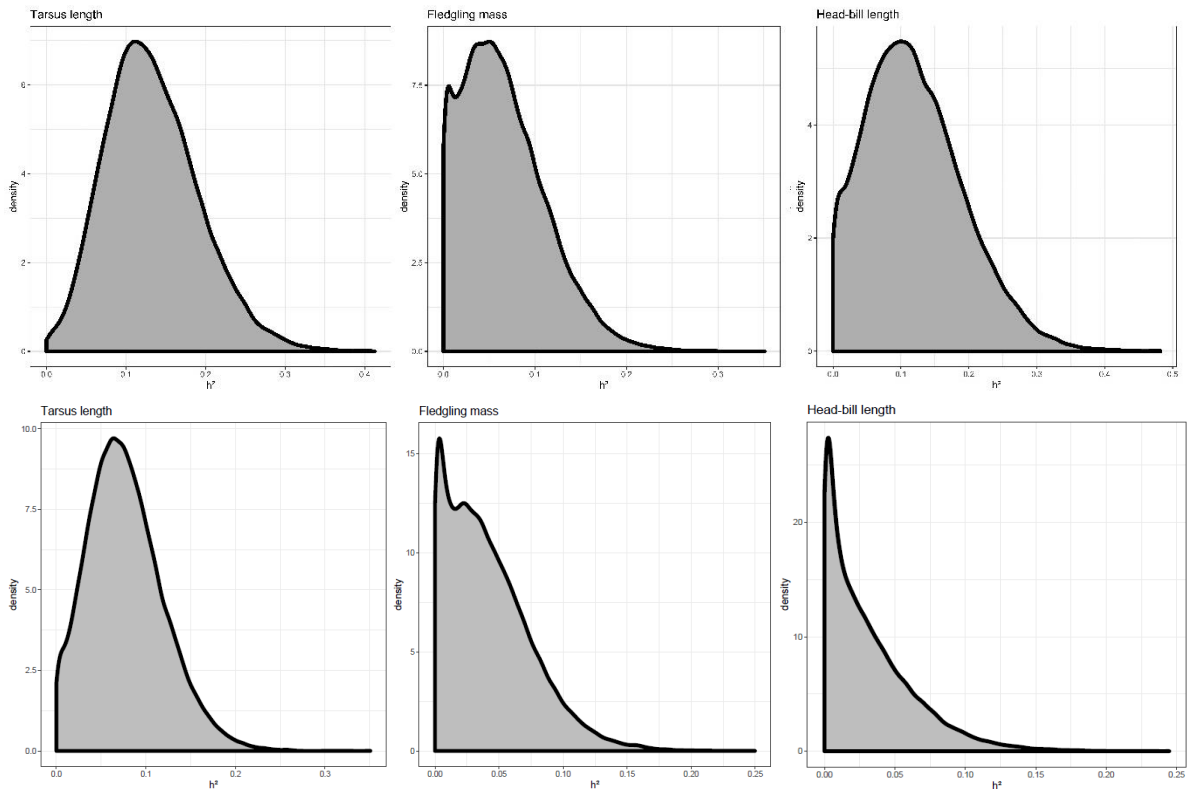

**Figure S1:** Density graph for the *MCMCglmm* heritability estimates using the pedigree (top row) and the genomic relatedness matrix ( $h^2_{GRM1}$ ) (bottom row) for all three morphological traits using the model described in the main text. Plotted using the `cairo_pdf/plot_grid` function in R.

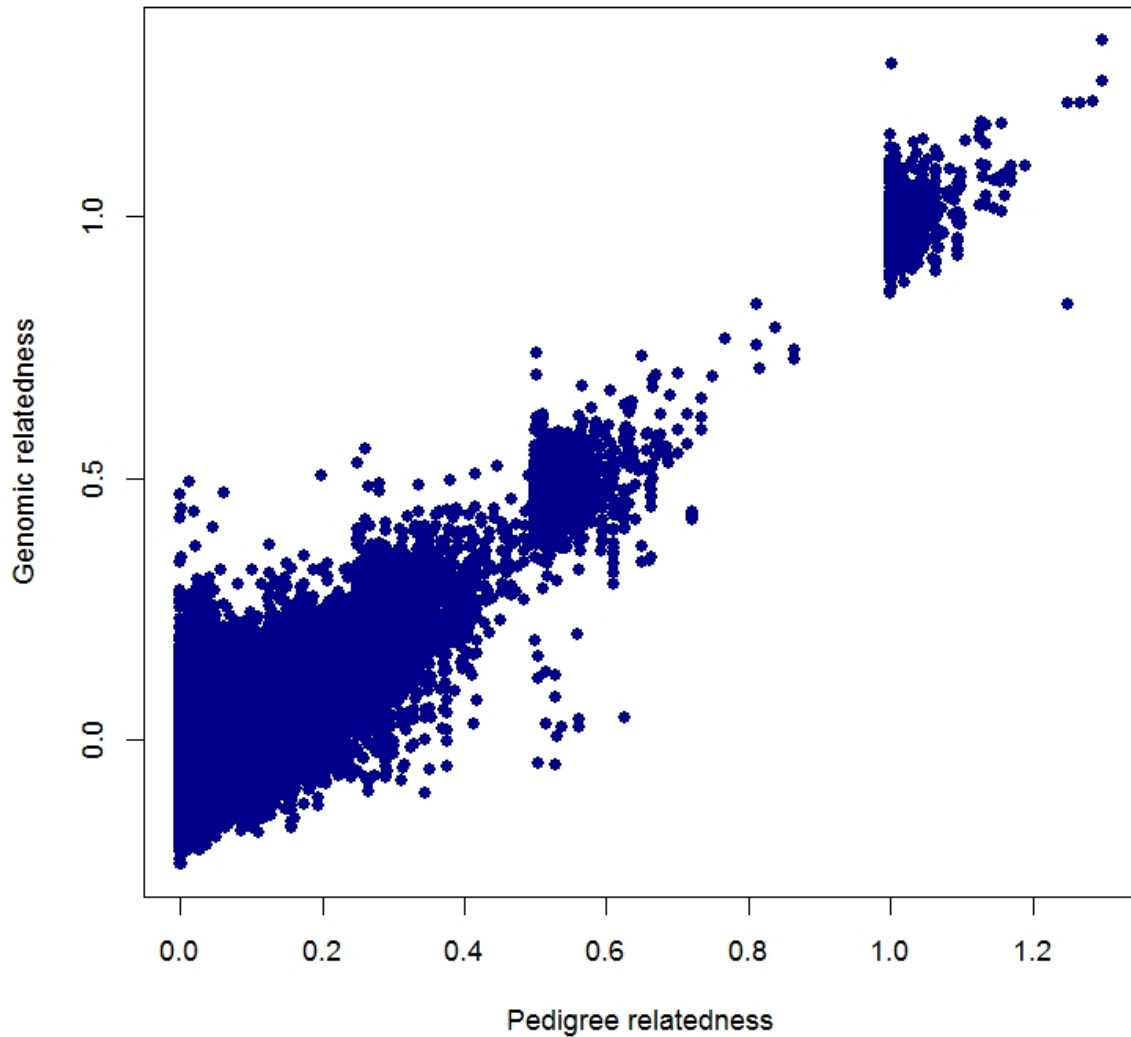

**Figure S3:** Graph showing the correlation between the pedigree-based relatedness matrix (A) and the genomic relatedness matrix (GRM) based on 39,699 SNPs for 523 hihi individuals. The overall correlation coefficient is 0.847 for all pairs of individuals (i.e. Pearson's correlation of the upper triangle of the relatedness matrices, including the diagonal), and 0.749 if self-self relatedness is excluded (i.e. Pearson's correlation of the upper triangle of the relatedness matrices, excluding the diagonal).

a) Tarsus length

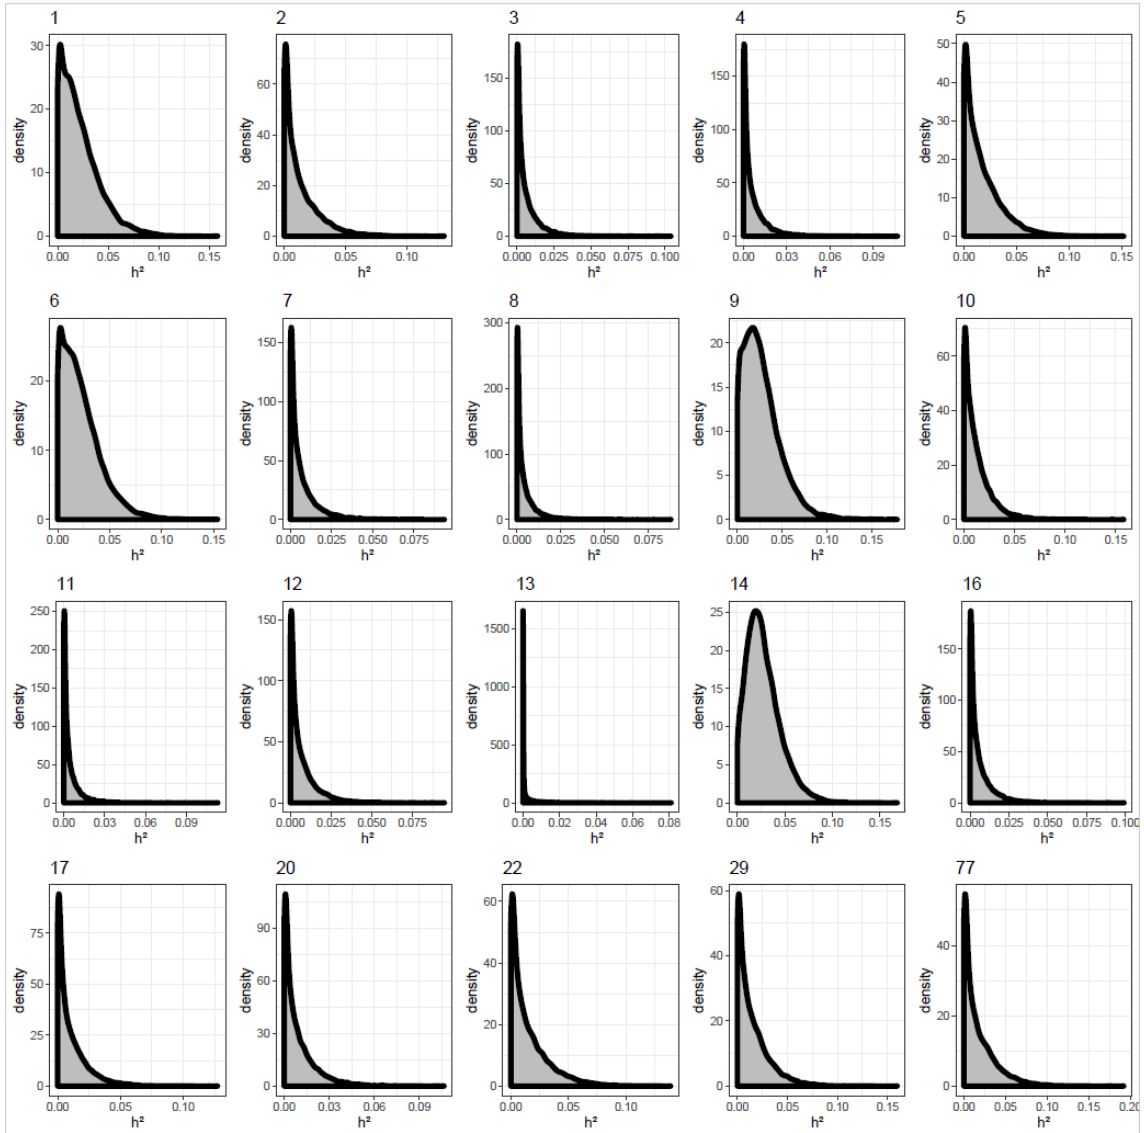

b) Body mass

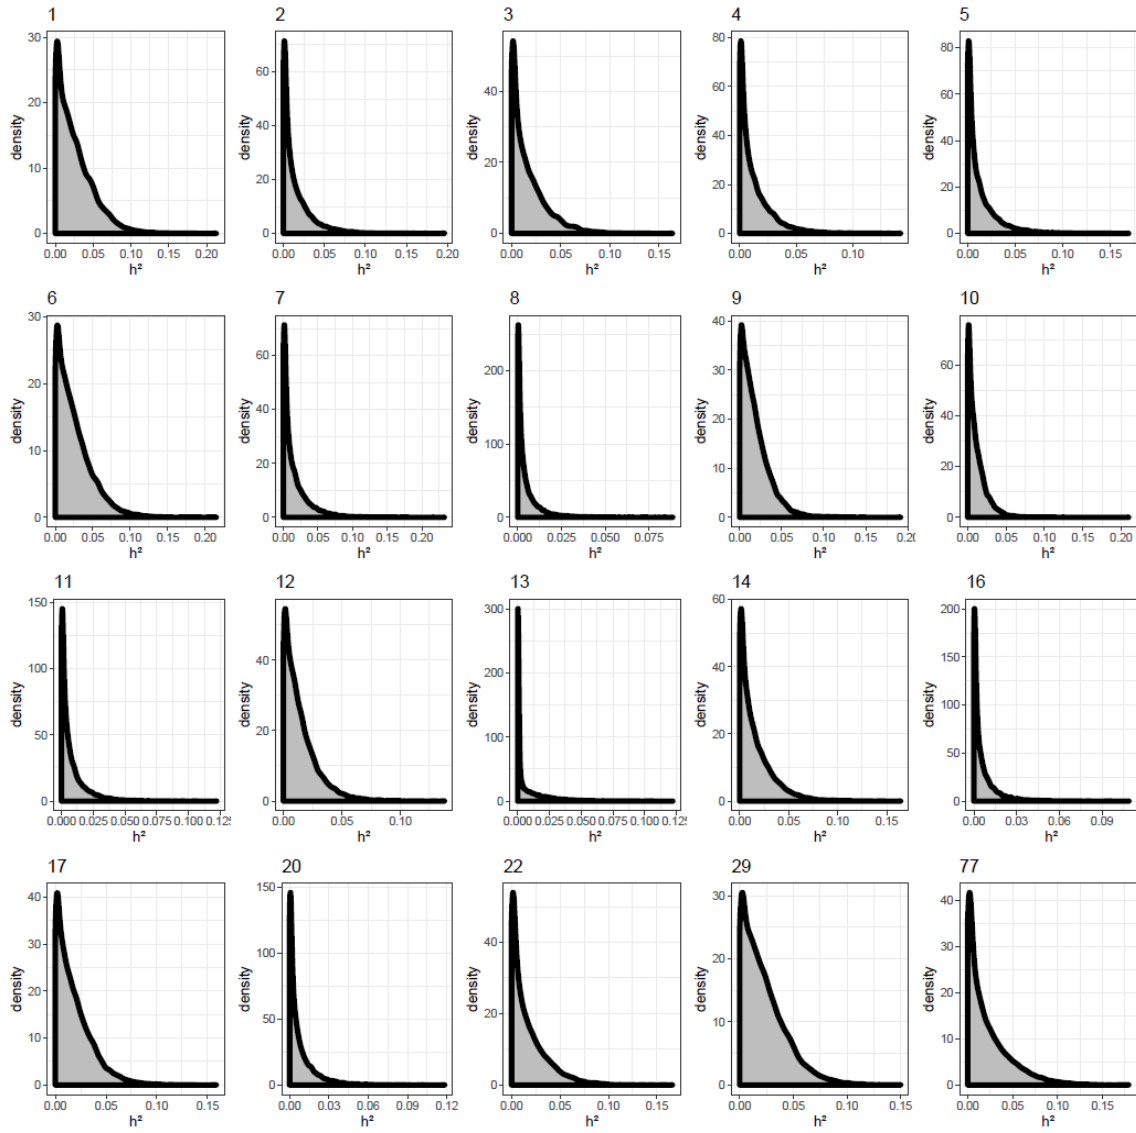

c) Head-bill length

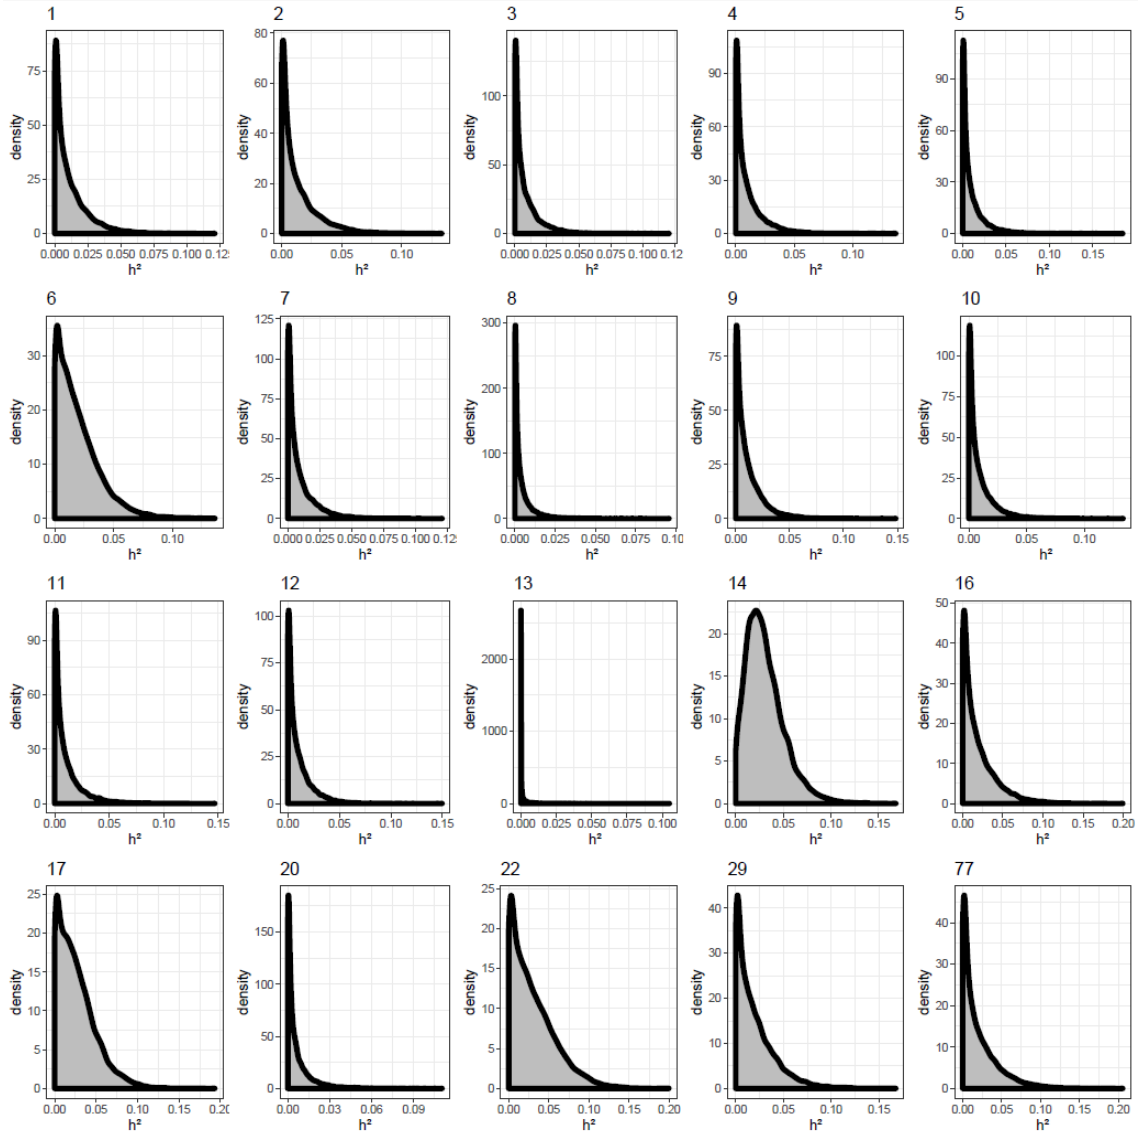

**Figure S4:** Density graphs of the *MCMCglmm* estimates for chromosome heritabilities for all three morphological traits after chromosome partitioning using the model described in the main text. Plotted using the `cairo_pdf/plot_grid` function in R. Chromosome numbers: 1-14 are estimated from markers mapped to zebra finch chromosomes 1-14, 16 = chromosome 4A and chromosome 15, 17 = chromosomes 17, 18 and 19, 20 = chromosome 20, 22 = chromosomes 21-28, 1B and LGE422, 29 = chromosome 1A, 77 = markers mapped to zebra finch Unknown or random chromosomes or with no alignment to the zebra finch genome.

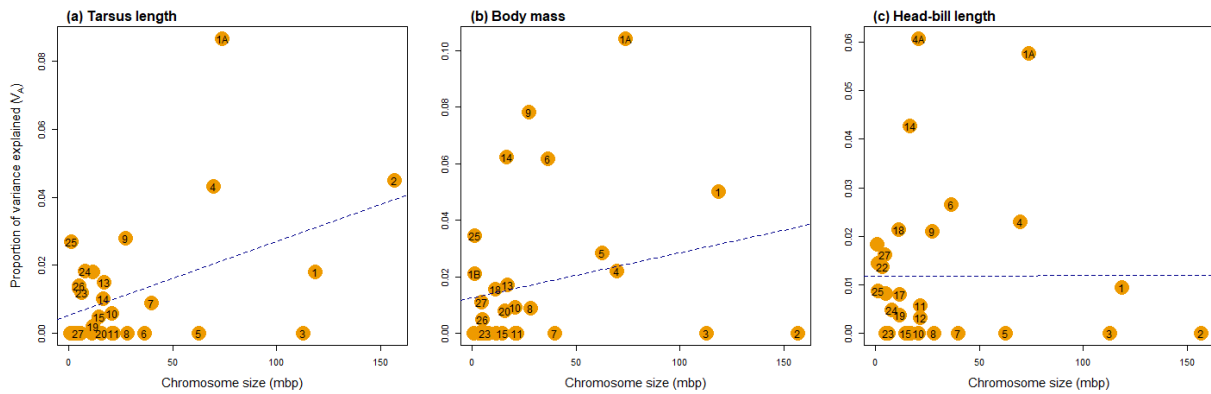

**Figure S5:** The proportion of variation explained by each chromosome (in yellow circles, except for 'Chr 77') for all three traits (tarsus length, body mass and head-bill length) as calculated in *GCTA* for the 523 hihi. Plotted is the mean additive genetic variance explained by each chromosome ( $V_A$ ) against the length of the chromosome (in Mbp) based on the zebra finch reference genome (overlapping chromosome not shown). Raw phenotypes were used (only corrected for fixed effects) to avoid convergence errors and hence be able to include all chromosomes. After HC correction all p-values were non-significant (0.119402985, 0.3485535 and 0.6963788).

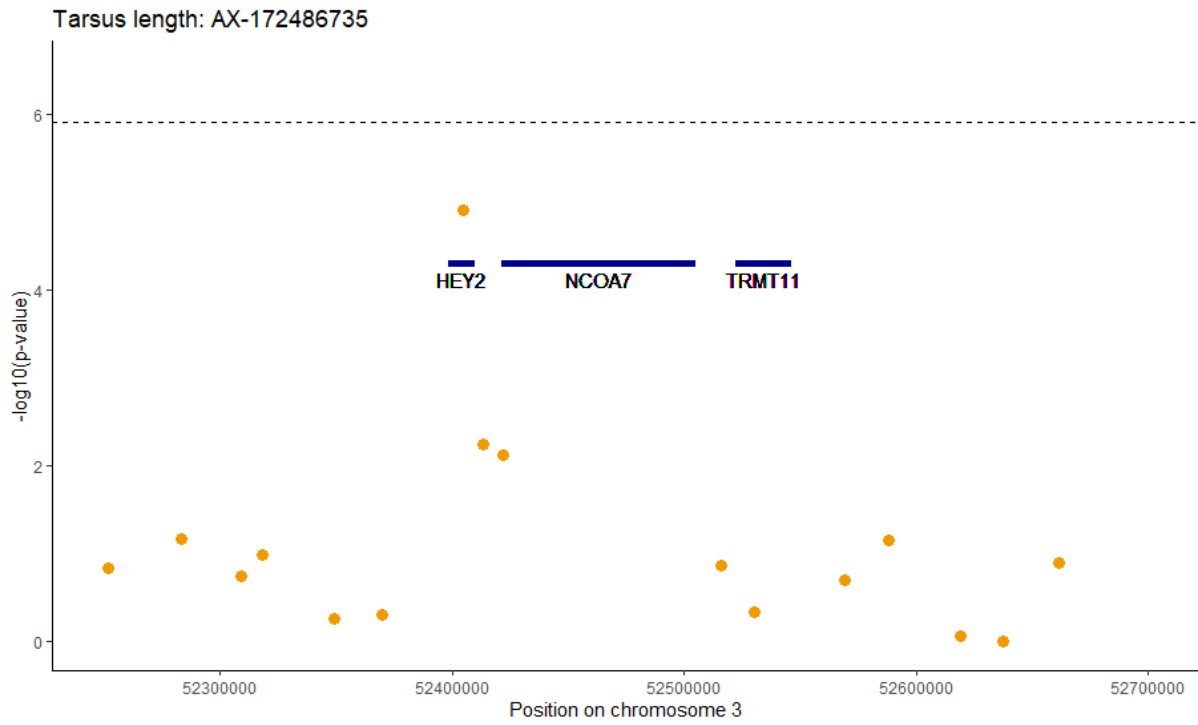

**Figure S2:** Zoom into the genomic area around the most significant SNP for tarsus length ( $p=1.23e-05$ ) according to the GWAS analysis in *RepeatABEL*. Gene annotations appear according to the annotated zebra finch genome.

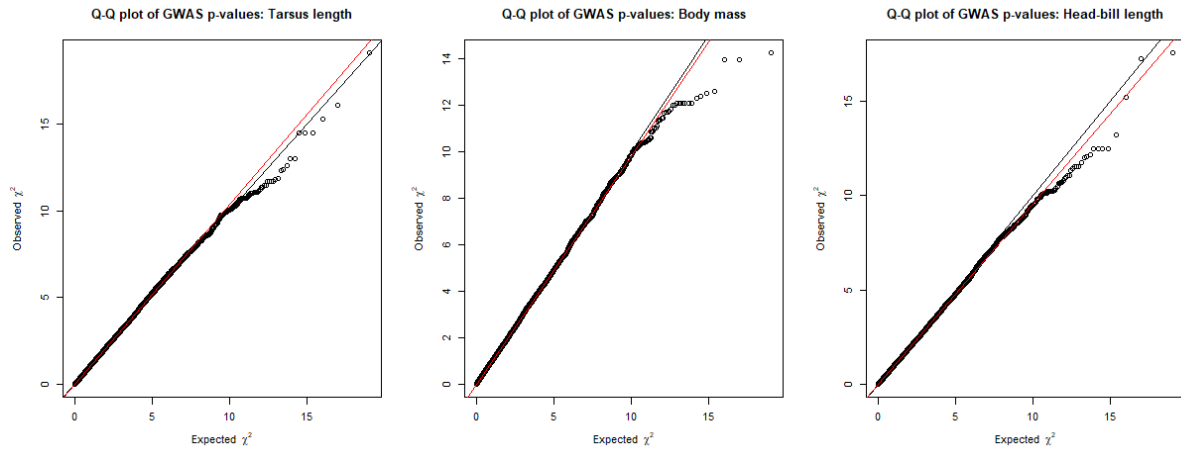

**Figure S7:** Q-Q plot of the p-value distributions for all the *RepeatABEL* GWAS runs using the “preFitModel” function. Lambda (genomic inflation) values for tarsus length: 1.036452; body mass: 0.9827692; head-bill length: 0.9572672.
